# Supplementary material for: Genomic evolution, recombination, and inter-strain diversity of chelonid alphaherpesvirus 5 from Florida and Hawaii green sea turtles with fibropapillomatosis
Source: PeerJ journal article supplement (doi:10.7717/peerj.4386), 2018-02-20

**A**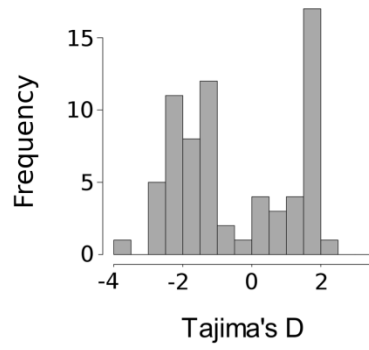**B**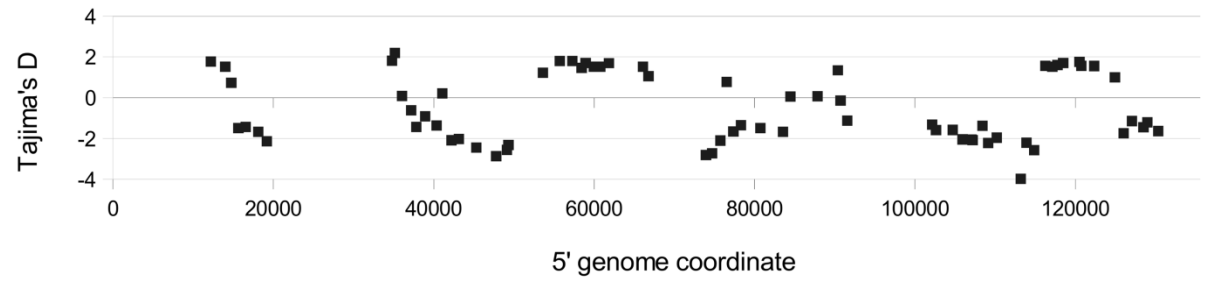

Supplement: FigureS2_TajimasD.pdf [file FigureS2_TajimasD.pdf]
