# Supplementary material for: Genomic evolution, recombination, and inter-strain diversity of chelonid alphaherpesvirus 5 from Florida and Hawaii green sea turtles with fibropapillomatosis
Source: PeerJ journal article supplement (doi:10.7717/peerj.4386), 2018-02-20
Supplement: FigureS3_Heatmap_singletons.pdf [file FigureS3_Heatmap_singletons.pdf]

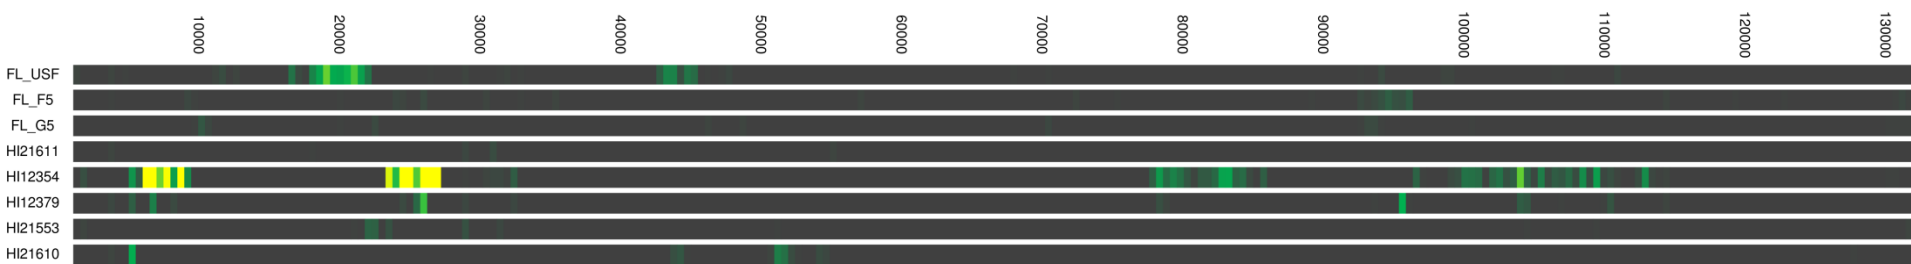

Standard deviations: 0 2 4 6 8 10+
